# Supplementary material for: Proteomic Profiling of Human Prostate Cancer-associated Fibroblasts (CAF) Reveals LOXL2-dependent Regulation of the Tumor Microenvironment
Source: PubMed Central journal article supplement (PMC6601211; doi:10.1074/mcp.ra119.001496), 2019-05-06

# Supplemental Figure 1

A.

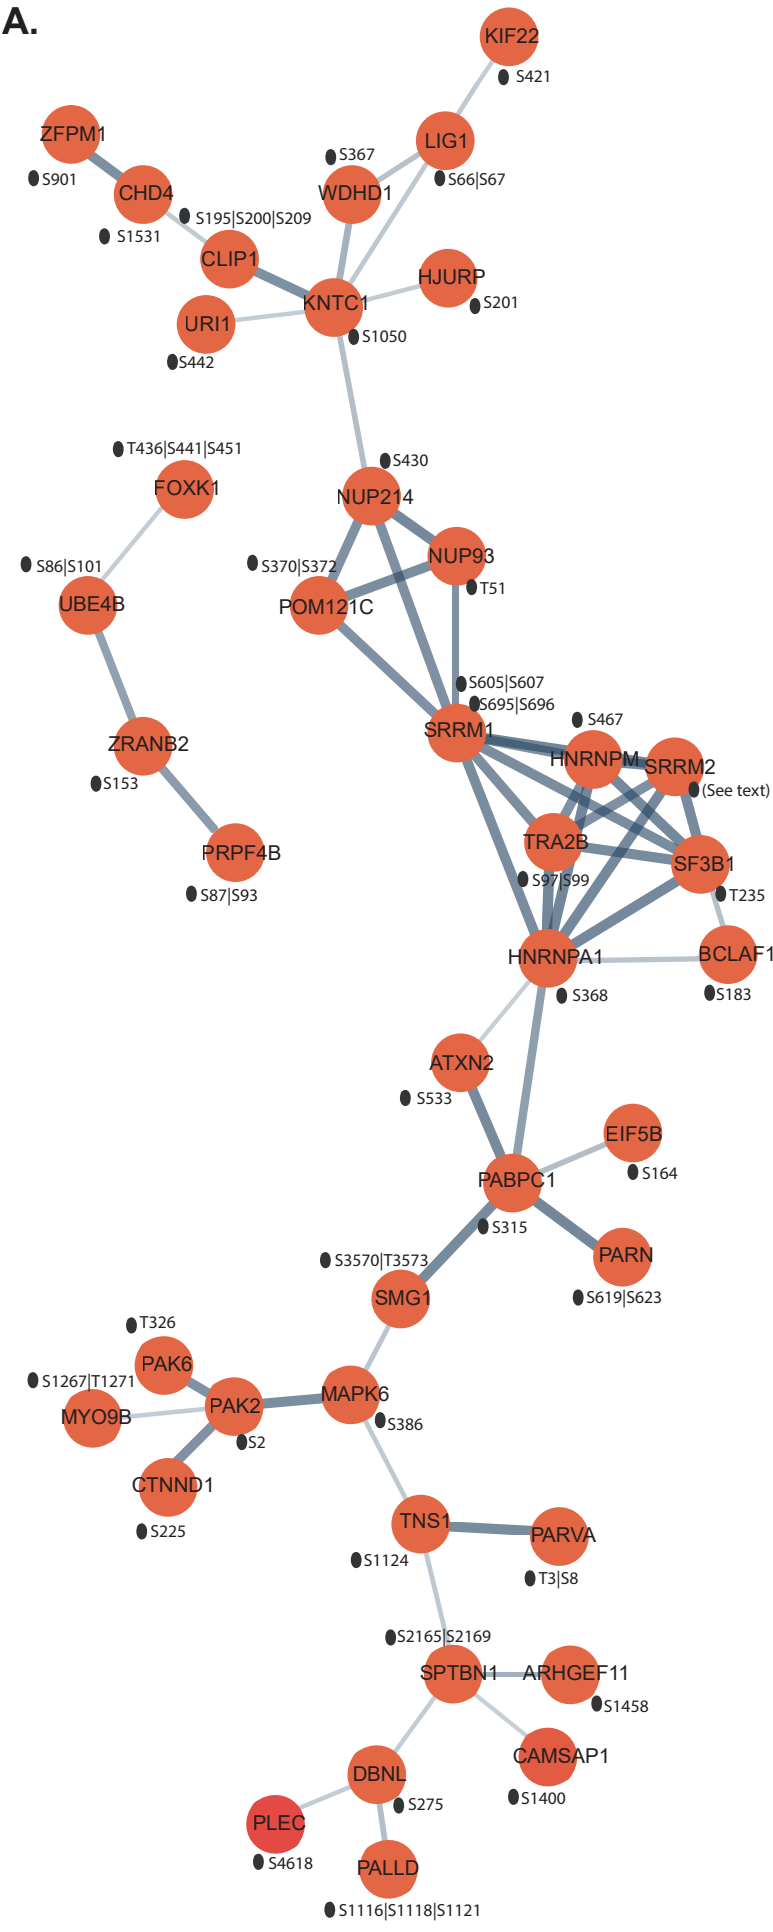

B.

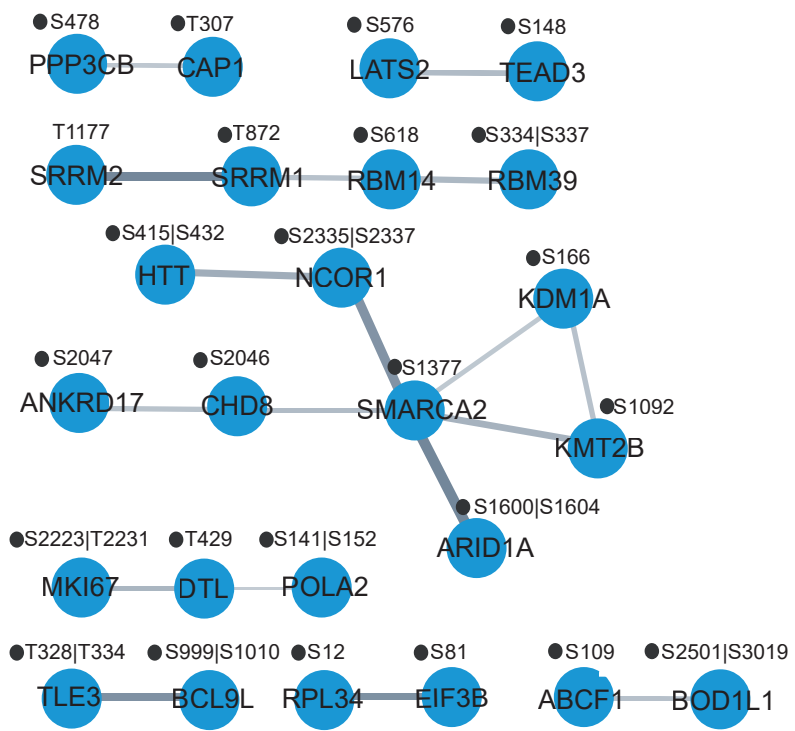

# Supplemental Figure 2

A.

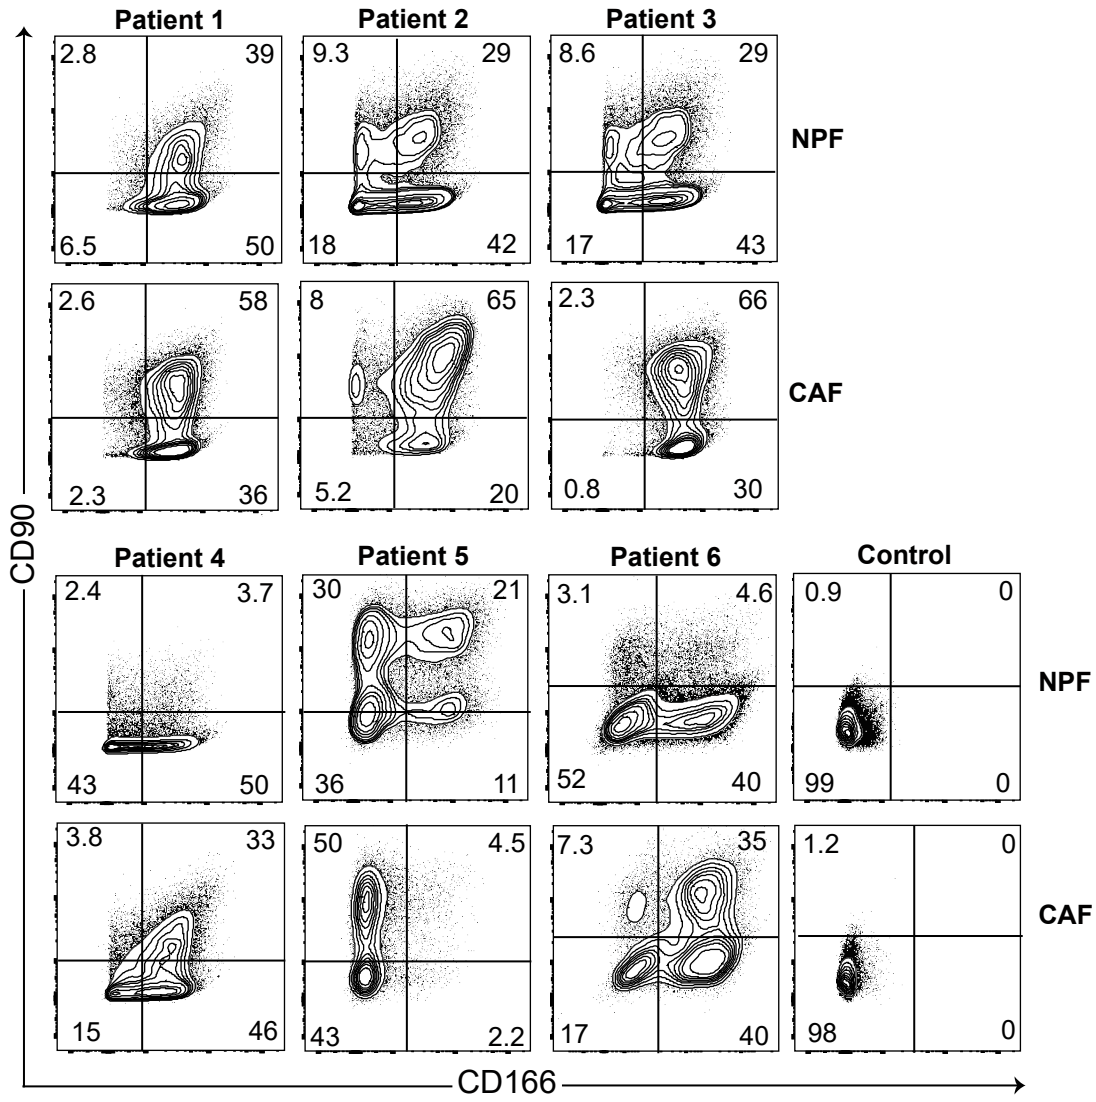

B.

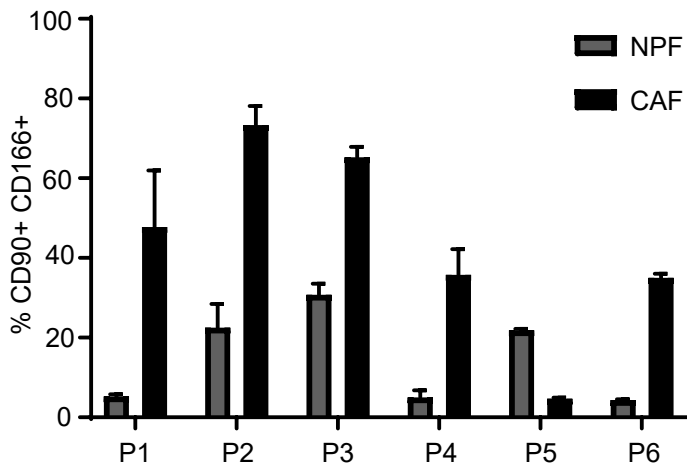

## Supplemental Figure 3

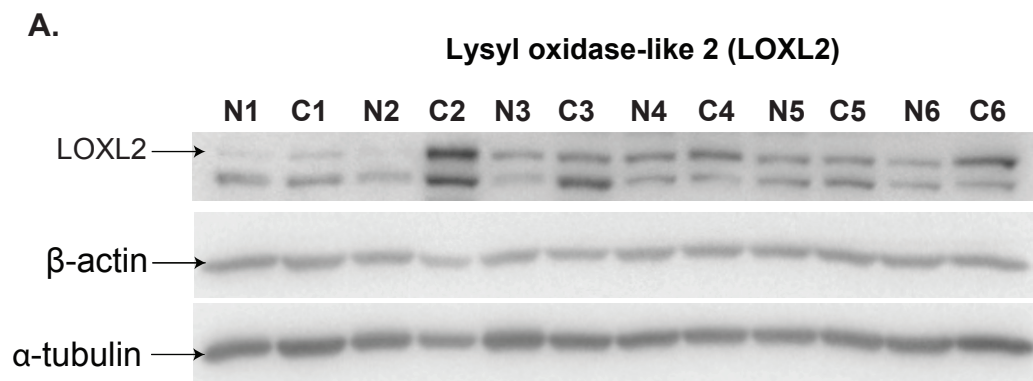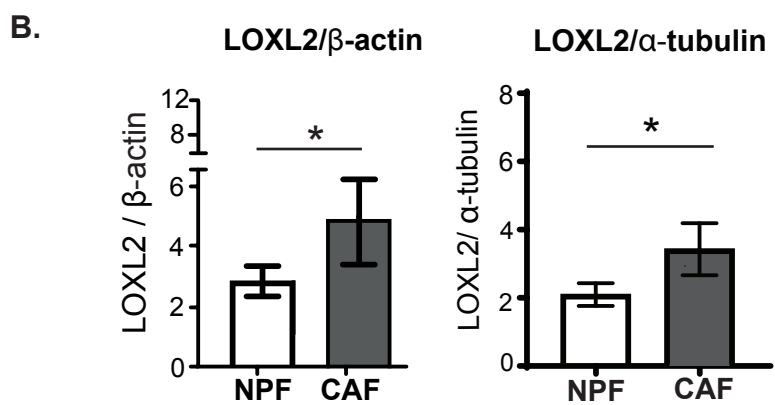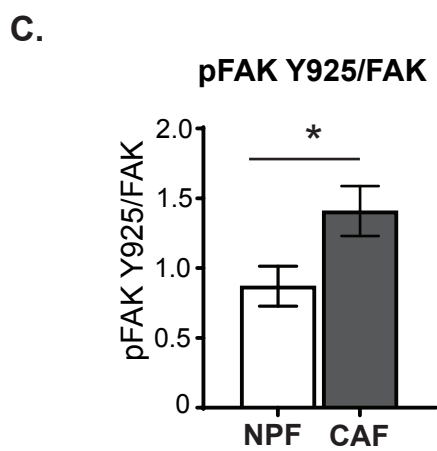

# Supplemental Figure 4

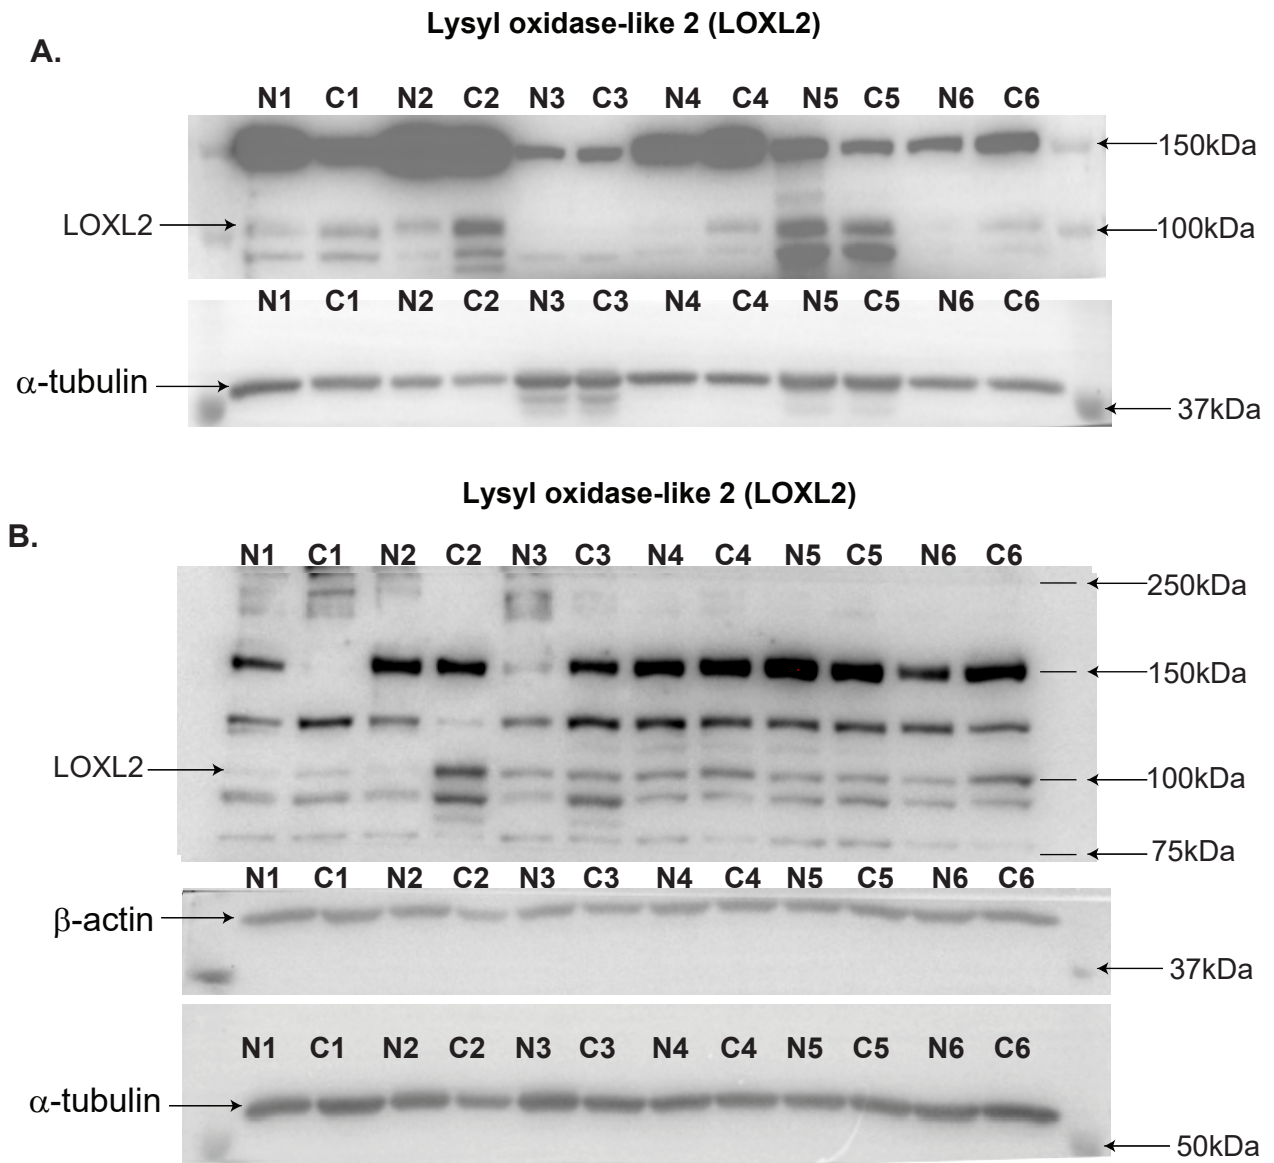

# Supplemental Figure 5

**A.**

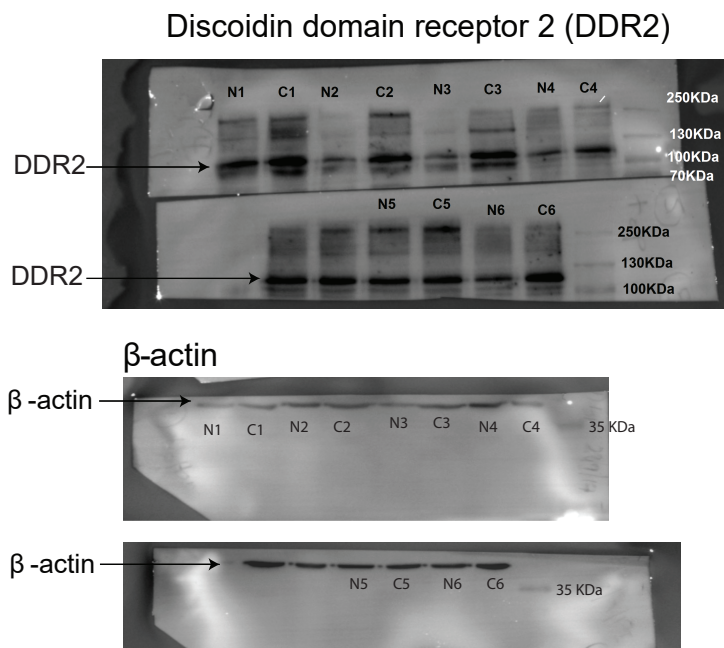

**B.**

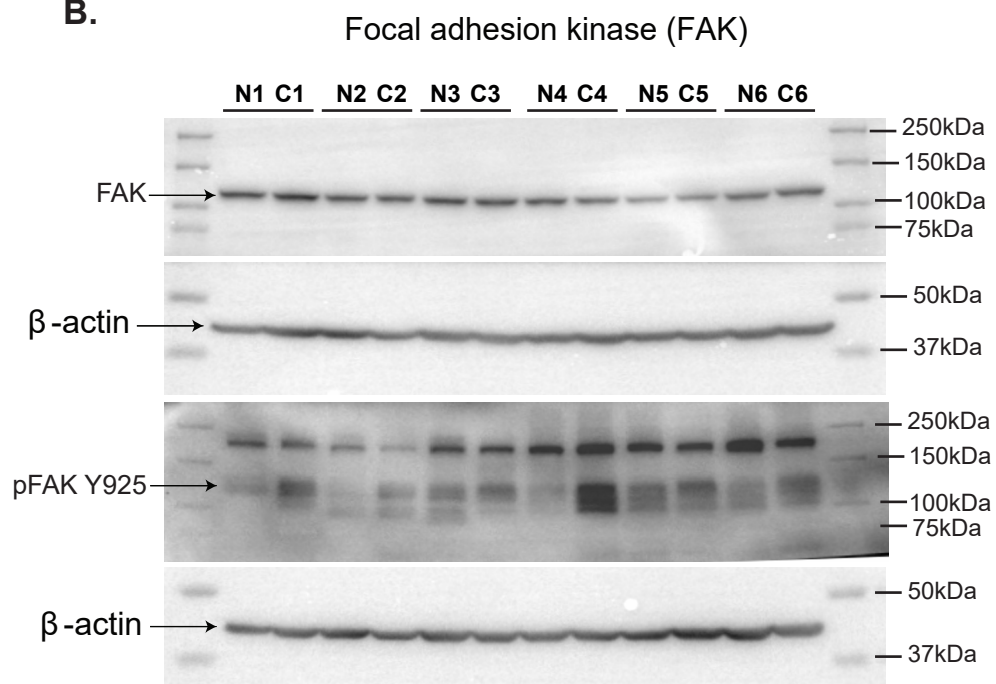

# Supplemental Figure 6

A.

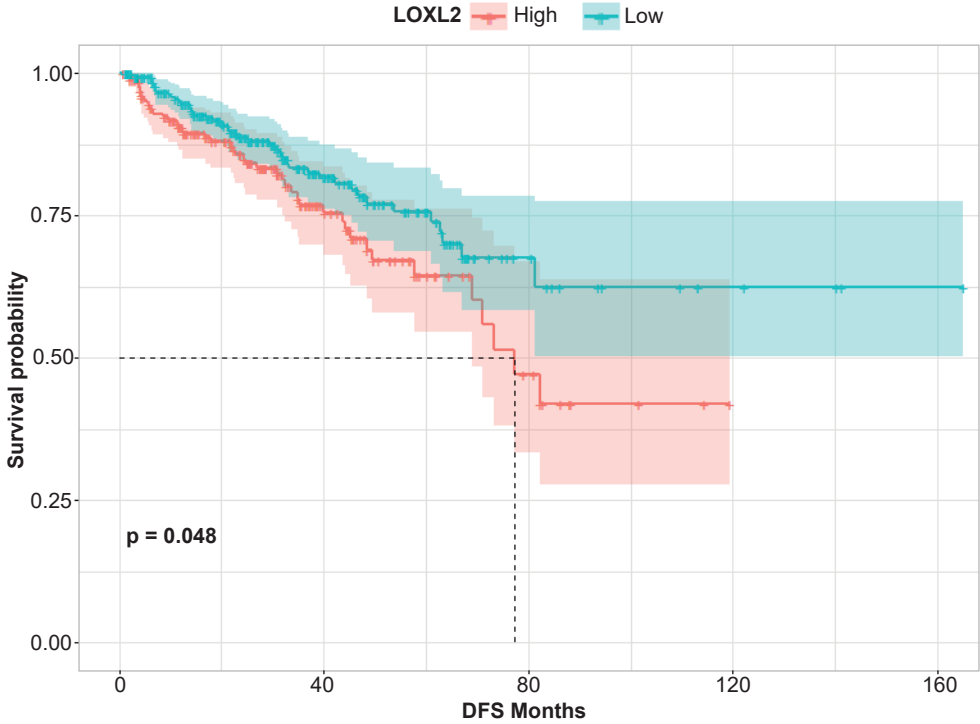

# Supplemental Figure 7

Ai.

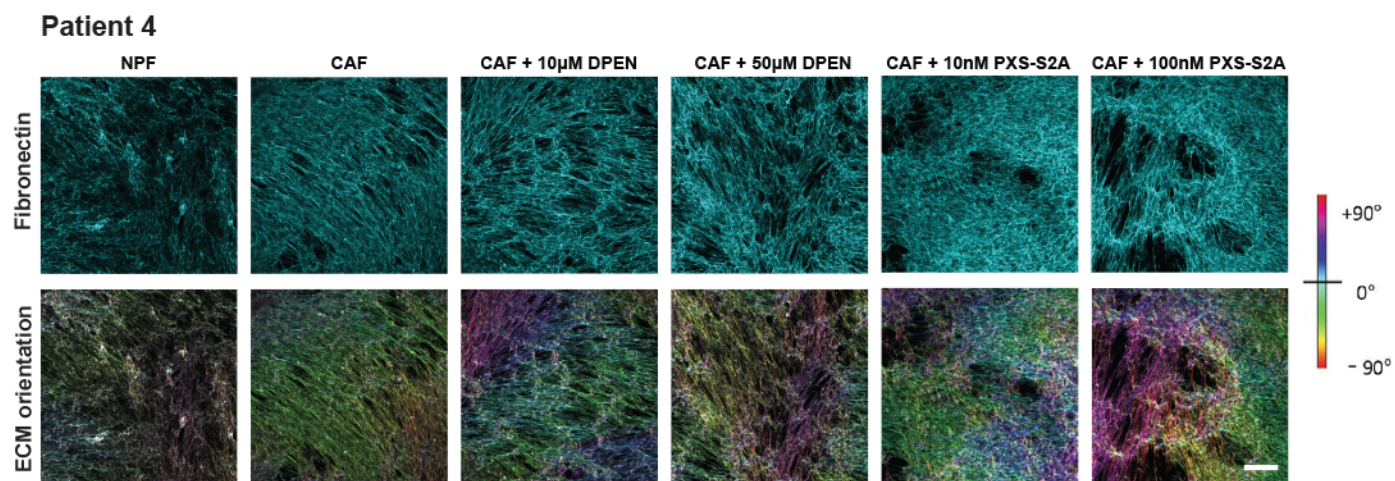

ii.

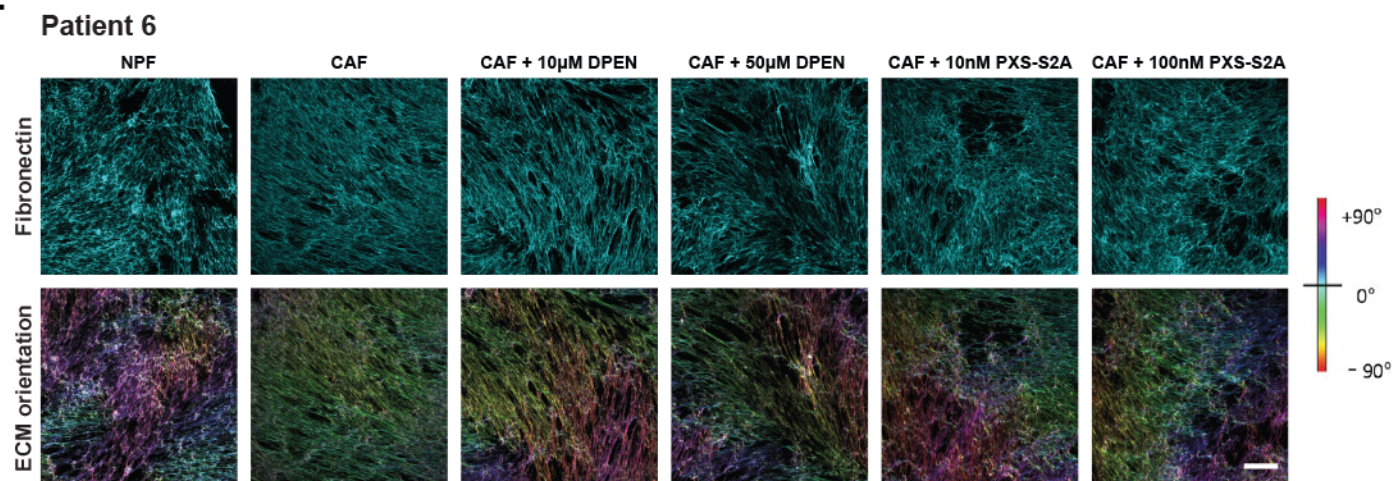

B.

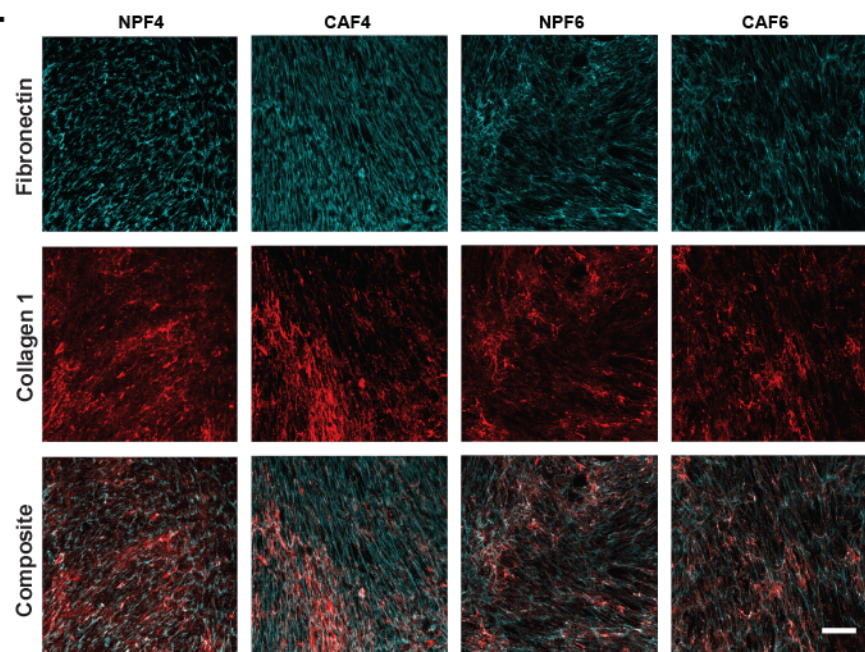

Supplement: 144877_1_supp_323413_pqssjg.pdf [file 144877_1_supp_323413_pqssjg.pdf]
